# Supplementary material for: Endogenous MicroRNA Competition as a Mechanism of shRNA-Induced Cardiotoxicity
Source: PubMed Central journal article supplement (PMC6957822; doi:10.1016/j.omtn.2019.12.007), 2019-12-18
Supplement: mmc1.pdf [file mmc1.pdf]

**OMTN, Volume 19**

## **Supplemental Information**

### **Endogenous MicroRNA Competition as a Mechanism of shRNA-Induced Cardiotoxicity**

**Meredith M. Course, Kathryn Gudsruk, Nitin Desai, Joel R. Chamberlain, and Paul N. Valdmanis**

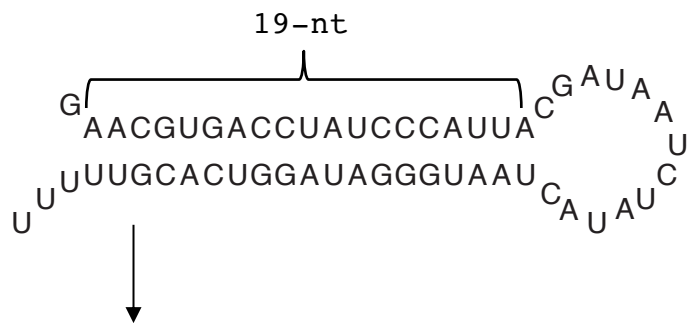

| 19-nt stem reads       | Proportion of top reads |
|------------------------|-------------------------|
| ATGGGATAGGTCACGTTTTTT  | 17.3%                   |
| ATGGGATAGGTCACGTTTTTTT | 31.6%                   |
| AATGGGATAGGTCACGTTTTT  | 32.1%                   |
| AATGGGATAGGTCACGTTTTTT | 14.4%                   |

19-nt: GAACGTGACCTATCCCATTACG--ATAATCTATACT--AATGGGATAGGTCACGTTTTTTT

21-nt: GAACGTGACCTATCCCATTACGTGATAATCTATACTGTAATGGGATAGGTCACGTTTTTTT

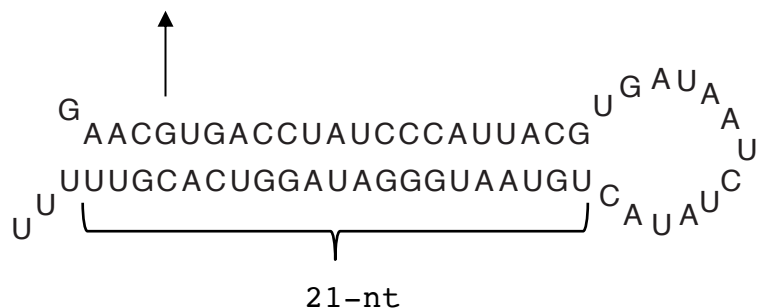

| 21-nt stem reads        | Proportion of top reads |
|-------------------------|-------------------------|
| TAATGGGATAGGTCACGTTT    | 4.8%                    |
| TAATGGGATAGGTCACGTTTT   | 49.1%                   |
| TAATGGGATAGGTCACGTTTTT  | 33.7%                   |
| TAATGGGATAGGTCACGTTTTTT | 7.6%                    |

### Figure S1. 19-nt and 21-nt *sh-lacZ* processing.

Shown are the predicted structures of the 19-nt and 21-nt hairpins, their flattened sequences, and the top four reads that are produced from the hairpins along with their relative abundance ( $n = 3$ , proportion is the mean average of reads in three hearts analyzed at 6-weeks post-injection). The reads produced from the 19-nt hairpin are not observed to an appreciable degree in the 21-nt-treated hearts, nor are the reads produced from the 21-nt hairpin observed in the 19-nt-treated hearts.

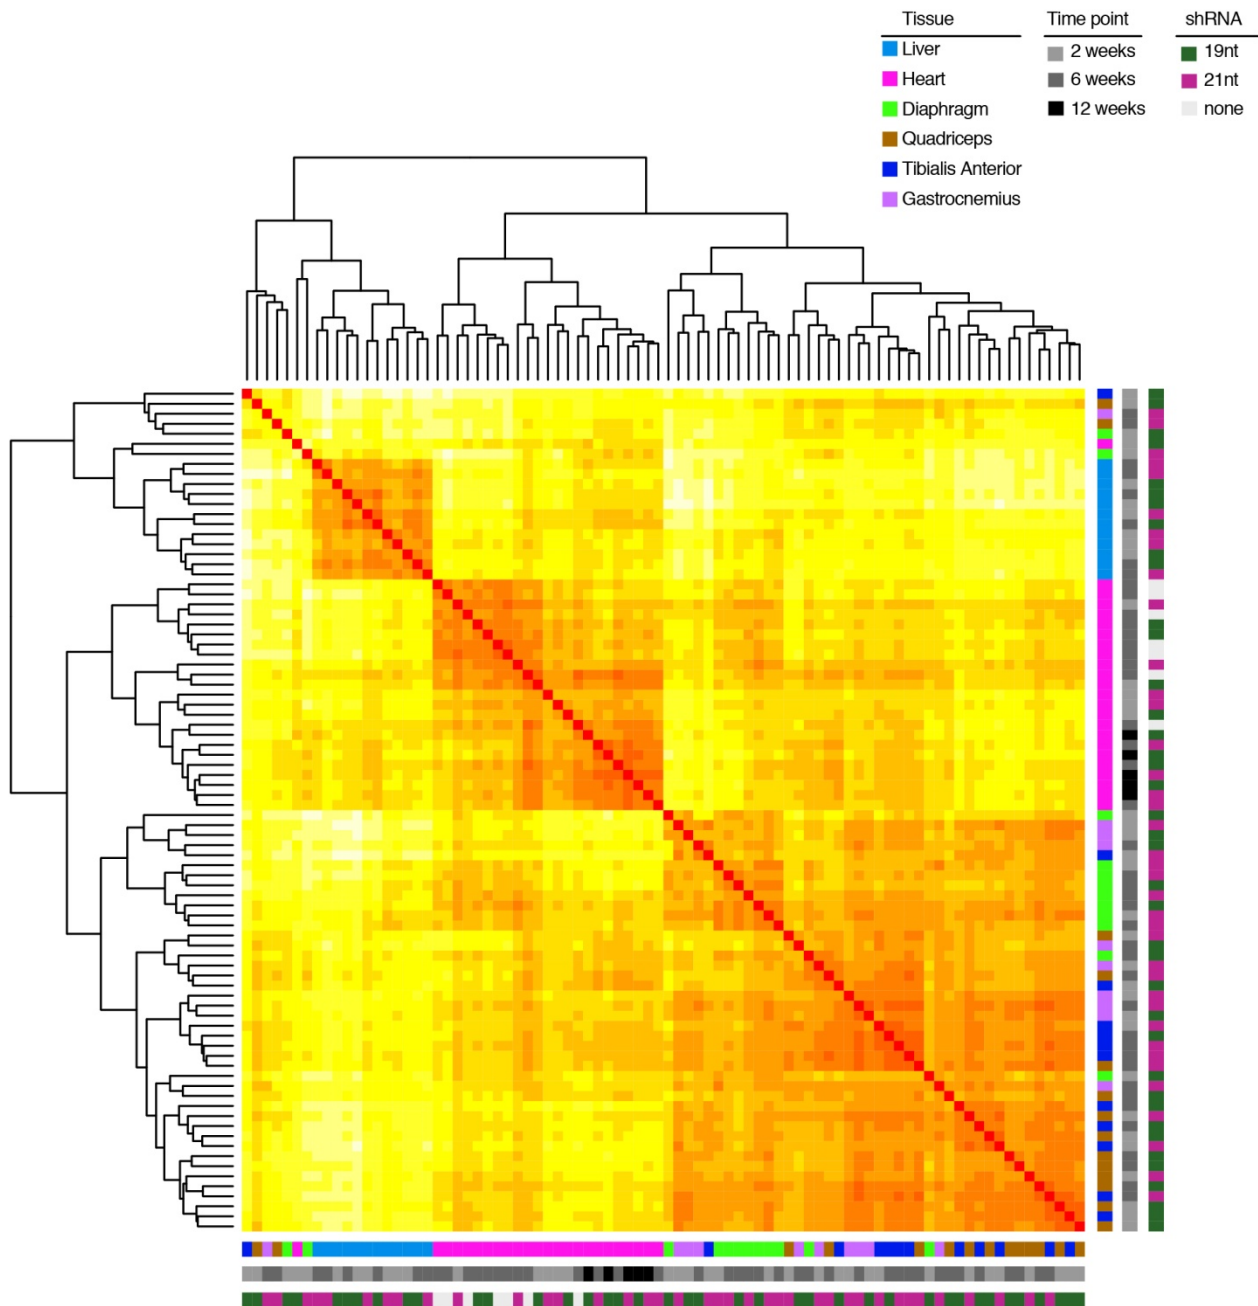

**Figure S2. Hierarchical clustering of all samples.** Tissue groups cluster into three broad categories: heart, liver, and all other muscles (diaphragm, quadriceps, tibialis anterior, and gastrocnemius). They do not cluster by time point (2, 6, or 12 weeks) or by treatment paradigm (no shRNA, 19-nt, or 21-nt).

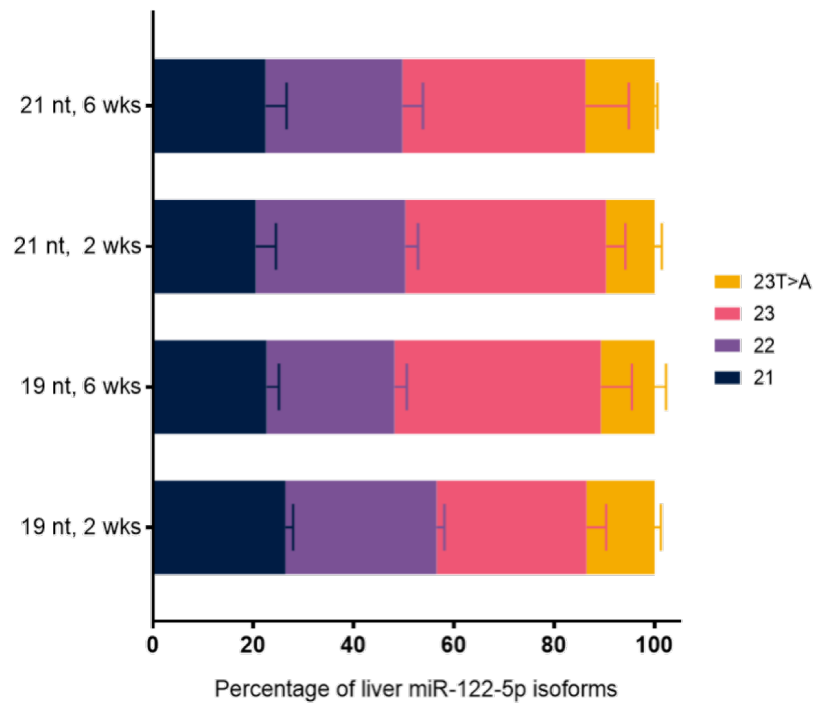

**Figure S3. MiR-122-5p isoforms in liver tissues of 19-nt and 21-nt injected mice.**

MiR-122-5p isoform expression in liver tissues after injection of the 19-nt shRNA and the 21-nt shRNA. The 22-nt isoform is not depleted relative to the 21-nt isoform.  $n = 3$  mice per group. Data are mean  $\pm$  SD.

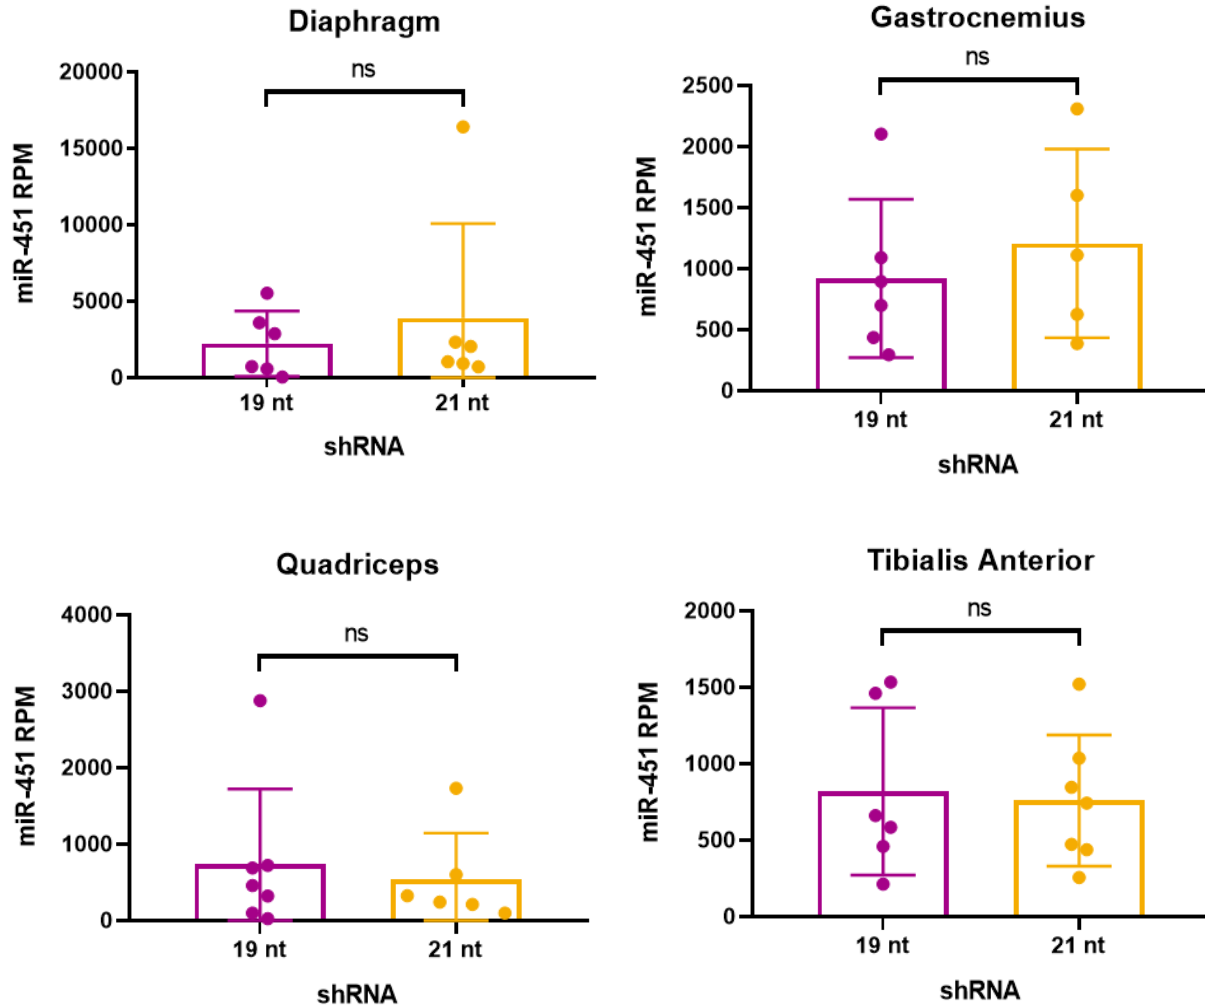

**Figure S4. MiR-451 in muscle tissues of 19-nt and 21-nt injected mice.**

MiR-451 expression in muscle tissues other than the heart after injection of the 19-nt shRNA and the 21-nt shRNA.  $n = 5-7$  mice per group. Data are mean  $\pm$  SD. RPM is reads per million. NS means “not significant,” as determined by a Student’s t-test.

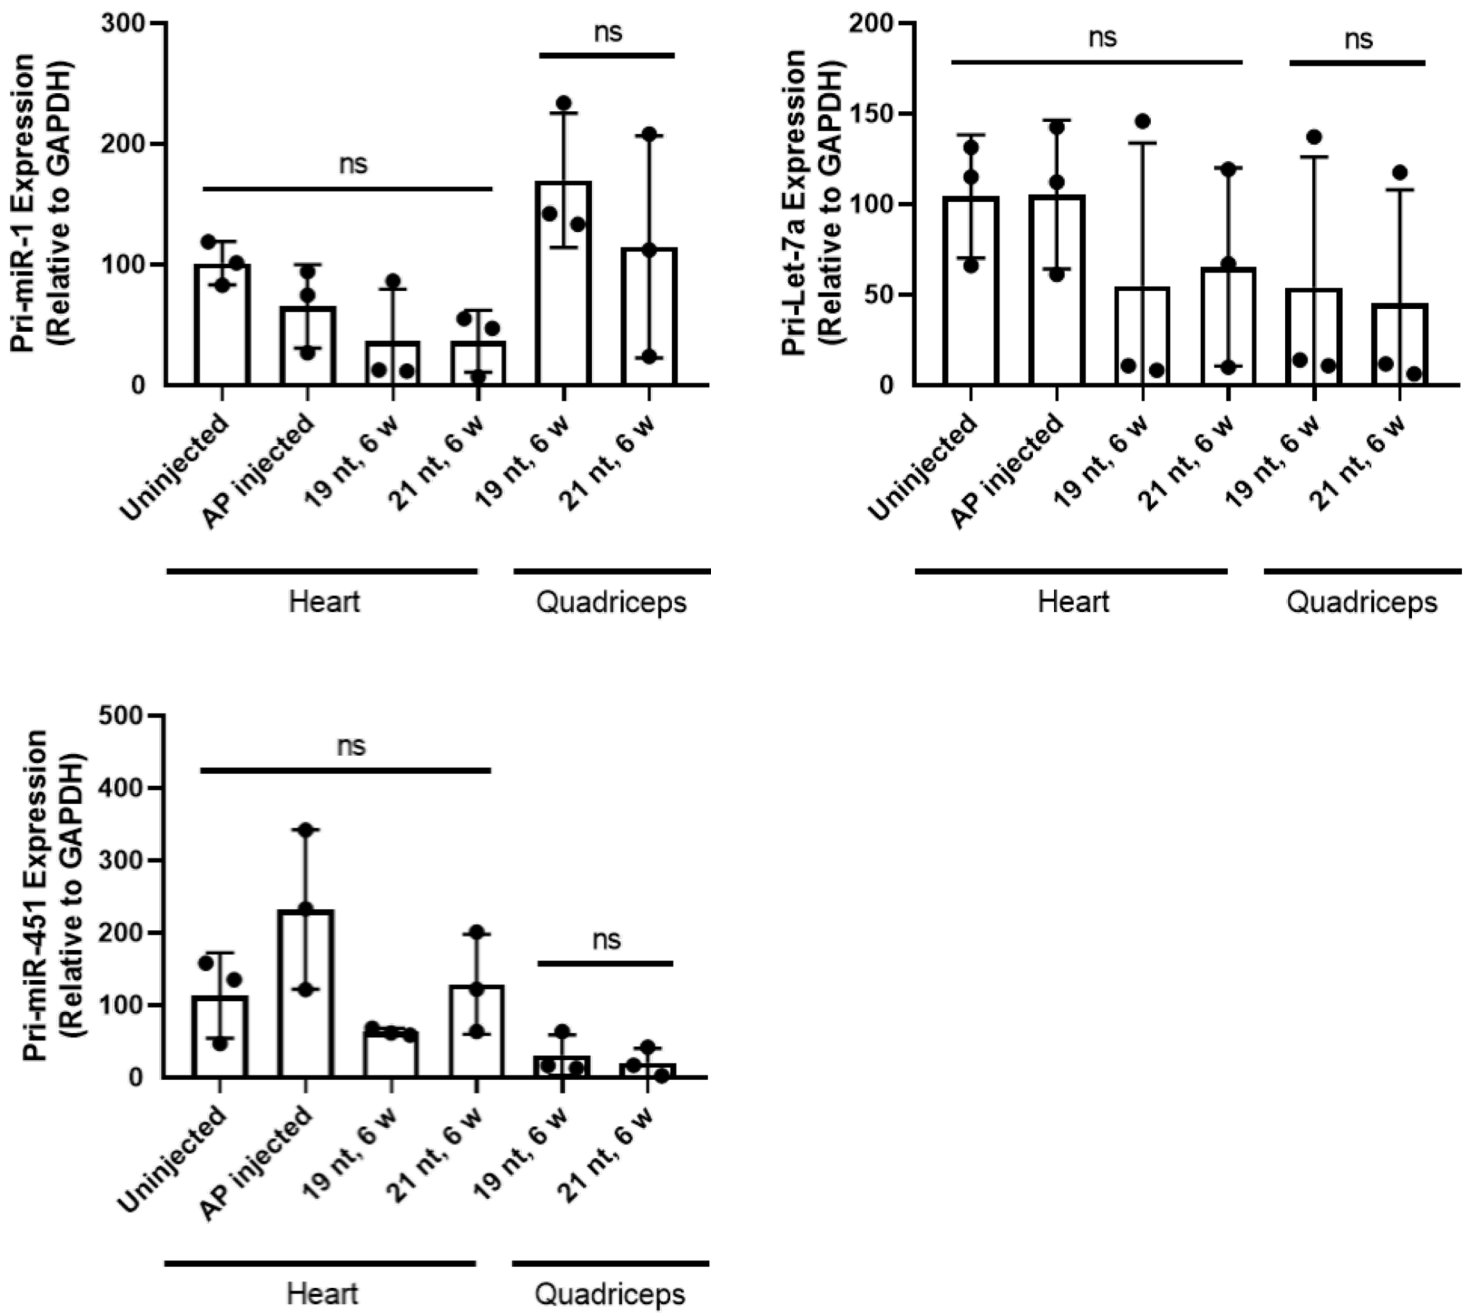

**Figure S5. Primary miRNA transcripts in muscle tissues of 19-nt and 21-nt injected mice.**

qRT-PCR for primary miRNA transcripts in heart and quadriceps tissues of 19- and 21-nt injected mice.  $n = 3$  mice per group. NS means “not significant.” Analyses performed were one-way ANOVA tests followed by Tukey’s multiple comparisons for heart tissue, and Student’s t-tests for quadriceps tissue. Data are mean  $\pm$  SD.
